# Supplementary material for: Highly durable all-fiber nanogenerator for mechanical energy harvesting
Source: Royal Society of Chemistry journal article supplement (doi:10.1039/c3ee41063c), 2013-01-01
Supplement: c3ee41063c.pdf [file c3ee41063c.pdf]

## Electronic supplementary information

### Highly durable all-fiber nanogenerator for mechanical energy harvesting

Wei Zeng,<sup>a</sup> Xiao-Ming Tao,<sup>\*a</sup> Song Chen,<sup>a</sup> Song Ming Shang,<sup>a</sup> Lai-Wa CHAN WONG<sup>b</sup> and  
Siu Hong Choy<sup>b</sup>

<sup>a</sup>Institute of Textiles and Clothing, The Hong Kong Polytechnic University, Hong Kong

<sup>b</sup>Department of Applied Physics, The Hong Kong Polytechnic University, Hong Kong

Corresponding author: Fax: + 852 -27731432, Tel.: + 852 - 27666470, E-mail:

tctaoxm@polyu.edu.hk

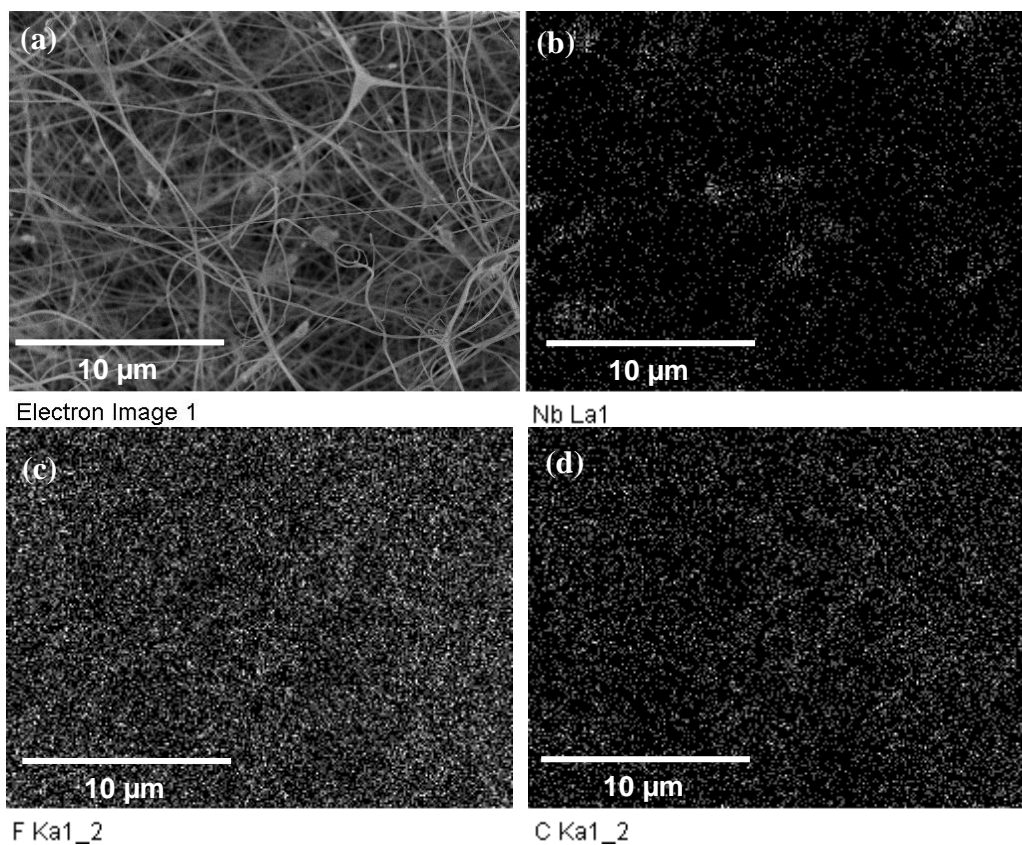

**Fig. S1.** (a) SEM image of  $\text{NaNbO}_3/\text{PVDF}$  nanofiber. SEM-EDS element mapping images of (b) Nb, (c) F, and (d) C collected from (a).

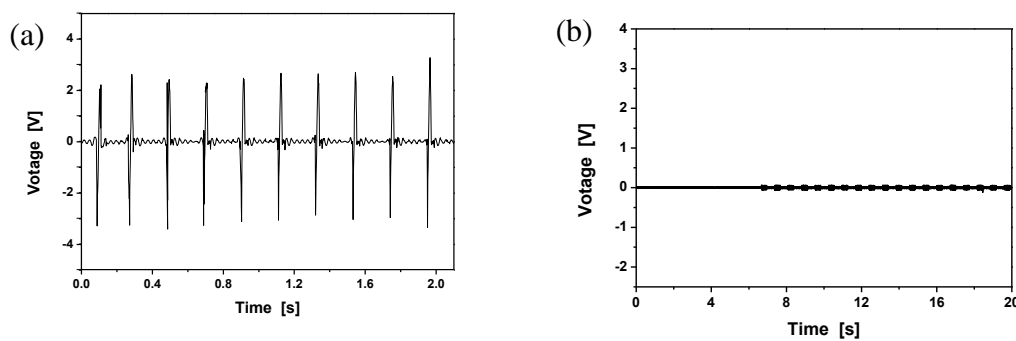

**Fig. S2.** Power generation of nanogenerators under a series of loading cycles. (a) Open circuit voltage outputs of  $\text{NaNbO}_3/\text{PVDF}$  nanofiber based nanogenerators with reverse electrode connection. (b) Open circuit voltage output of the un-poled PVDF film based generator.

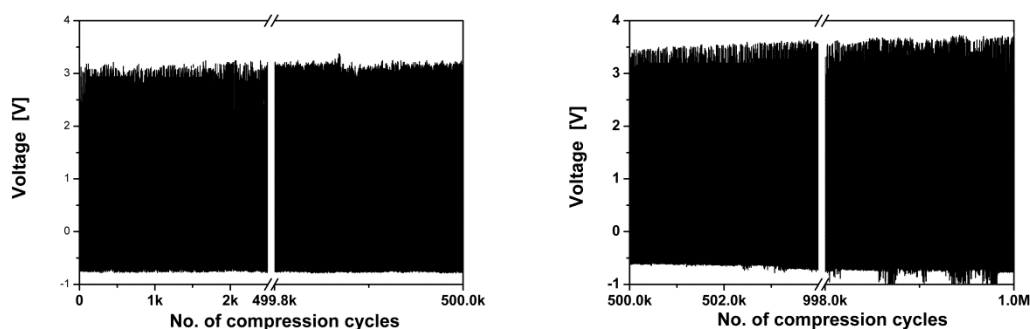

**Fig. S3.** Long-term stability of the Power generation of nanogenerators under a series of loading cycles (pressure: 0.2 MPa, frequency: 1Hz).

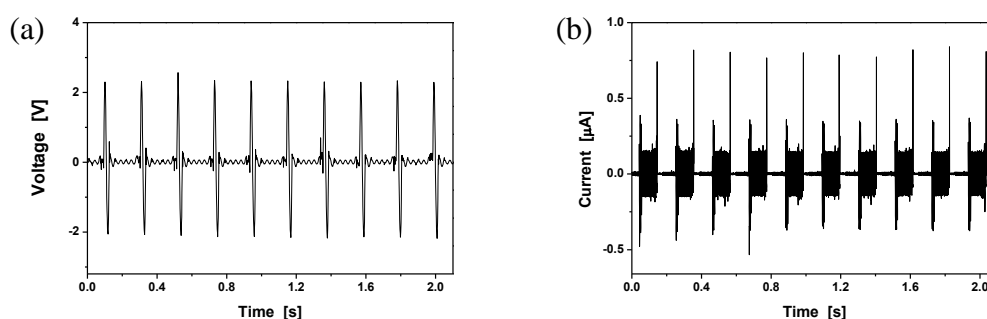

**Fig.S4.** Power generation of nanogenerators under a series of loading cycles (pressure: 0.2 MPa, frequency: 5 Hz). (a) Open circuit voltage output of the PVDF nanofiber based nanogenerator. (b) Current output of the PVDF nanofiber based nanogenerator.

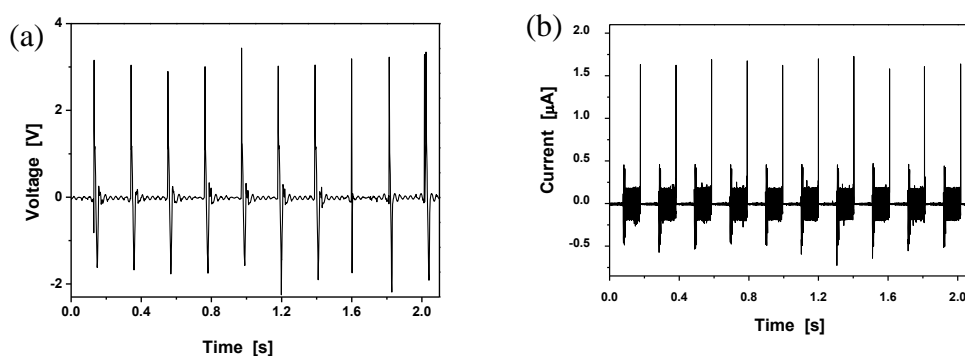

**Fig.S5.** Power generation of nanogenerators under a series of loading cycles (pressure: 0.2 MPa, frequency: 5 Hz and NaNbO<sub>3</sub> content: 1.0 wt%). (a) Open circuit voltage output of the PVDF/NaNbO<sub>3</sub>-based nanogenerators based generator. (b) Current output of the PVDF/NaNbO<sub>3</sub>-based nanogenerators.
